# Supplementary material for: Does powder and granular activated carbon perform equally in immobilizing chlorobenzenes in soil?
Source: Royal Society of Chemistry journal article supplement (doi:10.1039/c4em00486h), 2014-10-31
Supplement: c4em00486h1.pdf [file c4em00486h1.pdf]

**Supporting Information:**

**Table S1** Physico-chemical properties of chlorobenzenes studied.

|           | Molecular<br>formula                          | Molecular<br>weight | Melting<br>point<br>(°C) | Boiling<br>point<br>(°C) | S <sup>a</sup><br>(mg<br>L <sup>-1</sup> ) | Vapor<br>pressure<br>at 25 °C<br>(Pa) | H <sup>b</sup><br>(kPa·M <sup>3</sup><br>mol <sup>-1</sup> ) | K <sub>ow</sub> <sup>c</sup> |
|-----------|-----------------------------------------------|---------------------|--------------------------|--------------------------|--------------------------------------------|---------------------------------------|--------------------------------------------------------------|------------------------------|
| 1,2,4-TCB | C <sub>6</sub> H <sub>3</sub> Cl <sub>3</sub> | 181.45              | -17.00                   | 213.50                   | 45.30                                      | 45.30                                 | 0.439                                                        | 3.98                         |
| HCB       | C <sub>6</sub> Cl <sub>6</sub>                | 284.78              | 230.00                   | 322.00                   | 0.02                                       | 0.0023                                | 0.005                                                        | 6.18                         |

<sup>a</sup> Aqueous solubility at 25 °C. <sup>b</sup> Henry's law constant. <sup>c</sup> Log octanol/water partition coefficient.
